# Supplementary material for: Human-flood interactions in Rome over the past 150 years
Source: Copernicus journal article supplement (doi:10.5194/adgeo-44-9-2017), 2017-02-08
Supplement: Supplementary file 1 [file adgeo-44-9-2017-supplement.pdf]

Supplement of Adv. Geosci., 44, 9–13, 2017  
<http://www.adv-geosci.net/44/9/2017/>  
doi:10.5194/adgeo-44-9-2017-supplement  
© Author(s) 2017. CC Attribution 3.0 License.

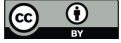

Advances in  
Geosciences

Open Access

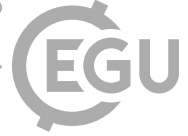

*Supplement of*

## **Human-flood interactions in Rome over the past 150 years**

**Giuliano Di Baldassarre et al.**

*Correspondence to:* Giuliano Di Baldassarre ([giuliano.dibaldassarre@geo.uu.se](mailto:giuliano.dibaldassarre@geo.uu.se))

The copyright of individual parts of the supplement might differ from the CC-BY 3.0 licence.

## Supplementary material: 1) Data and 2) Model code

### 1. Data

| <i>Year</i> | <i>Flood peak levels (m)</i> |
|-------------|------------------------------|
| 1805        | 16.42                        |
| 1846        | 16.25                        |
| 1870        | 17.22                        |
| 1900        | 16.17                        |
| 1915        | 16.08                        |
| 1937        | 16.84                        |

| <i>Year</i> | <i>Floodplain Population</i> |
|-------------|------------------------------|
| 1871        | 109 210                      |
| 1901        | 173 629                      |
| 1931        | 334 116                      |
| 1951        | 473 802                      |
| 1981        | 609 857                      |
| 1991        | 582 819                      |
| 2001        | 583 286                      |
| 2014        | 567 959                      |

### 2. Model code in R

```
library(deSolve)

##### Setting up the functions #####
# modelEQ_new and Weventfun_new simulate the socio-hydrological model as in
# Di Baldassarre et al. (2015)

# modelEQ_new simulates the three differential equations as if
# there were no perturbations from external forces (e.g. floods)
modelEQ_new <- function (t, state, parameters) {
  with(as.list(c(state, parameters)),{
    dMdt <- -mu_S*M                # Society
    dHdt <- -kappa_T*H             # Technology
    dDdt <- rho_D*(1 - D*(1 + alpha_D*M)) # Demography
    # return the rate of change
    list(c(dDdt, dHdt, dMdt))
  })
}

# Weventfun_new simulate the action of flood events on the socio-hydrological system
Weventfun_new <- function(t, y, parms){
  with (as.list(y),{
    W <- ifelse(any(Wevent$tW == t), Wevent$W[Wevent$tW == t], 0)
    if (W + parms["xi_H"]*H > H) {
      L <- D*(1 - exp(-(W + parms["xi_H"]*H)/(parms["alpha_H"])))
      R <- parms["epsilon_T"]*(W + parms["xi_H"]*H - H)
      if (D > parms["delta_E"]) {
        D <- D - L
        H <- H + R
        M <- M + L
      } else {
        D <- D - L
        M <- M + L
      }
    }
  })
  return(c(D, H, M))
}
```

```

    })
  }
}
# Function to terminate the process if D goes to 0
gameoverfun_new <- function (t, y, parms) {
  with (as.list(y),{
    return(D)
  })
}

##### Uploading the data #####
data <- read.csv("Rome_data.csv") # read the data
years <- data[,1] # years
Wr <- data[,2] # event magnitude
h <- data[,3] # levee height
Pmax <- data[,4] # max population density
Pmin <- data[,5] # min population density
Pma <- cbind(Pmax,Pmin)
P <- apply(Pma,1,mean) # mean population density

pP <- P[!is.na(P)] # aggregate population density discarding Na values
yP <- years[P %in% pP] # select years associated to non-Na population density values
hh <- h[!is.na(h)] # aggregate levee heights discarding Na values
hh[1:2] <- c(NA,NA) # discard level of the year 1800 equal to 16 m, assumed as a
# starting point of the analysis. Moreover, the year 1880 has
# associated two levee height values, being the year where levees
# where built. In plotting the data, we consider the higher only.

Wevent <- data.frame(years[!is.na(Wr)],
  Wr[!is.na(Wr)]) # aggregate flood event magnitude data discarding Na values
# and associate the corresponding years

names(Wevent) <- c("tW","W")

##### Performing the simulation #####
# Parameters
alpha_H = 30 # Parameter related to flood depth-damage curve

Rho_D=c(0.008,abs(pP[2]-pP[1])/(yP[2]-yP[1]),
  abs(pP[3]-pP[2])/(yP[3]-yP[2]),
  abs(pP[4]-pP[3])/(yP[4]-yP[3]),
  abs(pP[5]-pP[4])/(yP[5]-yP[4]),
  abs(pP[6]-pP[5])/(yP[6]-yP[5]),
  abs(pP[7]-pP[6])/(yP[7]-yP[6]),
  abs(pP[8]-pP[7])/(yP[8]-yP[7])) # relative population density values

rho <- mean(Rho_D) # mean relative population density
xi_H=0 # High water level enhancement due to presence of flood walls
alpha_D=20; # Ratio between preparedness and awareness
epsilon_T=1.1; # Safety factor for flood walls
kappa_T=0 # Protection level decay rate
mu_S=0.06 # Memory loss rate (half-life)
delta_E = 0.13 # this value discriminates whether levees will be built or not
parms=c(rho_D=rho, alpha_D=alpha_D, delta_E=delta_E, epsilon_T=epsilon_T, kappa_T=kappa_T,
  mu_S=mu_S, alpha_H=alpha_H, xi_H=xi_H) # vector of parameters
#Initial conditions:
H0 <- 0 # initial levee height
M0 <- 0 # no awareness is assumed at the beginning
D0 = 0.001 # initial population density
y=c(D=D0, H=H0, M=M0)

# Perform the simulation:
times <- seq(min(years),max(years), by=1) # timespan over which the analysis will be carried out
sim <- dede(y=y, t = times, func=modelEQ_new,parms=parms,
  events=list(func=Weventfun_new, time=Wevent$tW), rootfun=gameoverfun_new)

```
